# Supplementary material for: Warming accelerates belowground litter turnover in salt marshes – insights from a Tea Bag Index assay
Source: Copernicus journal article supplement (doi:10.5194/bg-2022-189), 2022-10-04
Supplement: Supplementary file [file bg-2022-189-AC3-supplement.pdf]

We would like to thank three reviewers for their time and constructive comments. Below we respond to each comment separately (in blue font) referring to the line numbers of the original submission.

#### **Referee #1**

The paper represents a very important perspective of coastal ecosystem carbon dynamics which is not adequately understood. The findings and arguments of the study are critical and very important for future studies exploring coastal soil carbon dynamics which is susceptible to climate change. The manuscript is very well written, explained and discussed. Data are very well presented and clearly interpreted.

Experimental design and methods used to cover the whole soil profile is the significant development in the study. But the issue of whether TBI materials represent the real world scenario with regard to belowground biomass, litter and organic matter turnover remains critical.

We intend to elaborate on this point in the respective subsection of the Discussion, i.e. the Methodological considerations:

*The interpretation of results obtained from standardized approaches like the TBI needs to be made cautiously because litter quality is a key parameter controlling its decomposition and turnover dynamics. Because TBI materials differ from that of native salt-marsh plant litter, we did not expect to capture actual rates of litter breakdown and turnover with our approach. However, standardized approaches like the TBI, or the cotton-strip assay (e.g., Latter and Walton, 1988), are useful to separate the effects of abiotic factors, e.g. warming, from litter-quality effects on decomposition processes, thus facilitating an improved mechanistic understanding (Keuskamp et al. 2013; Tang et al. 2021; Mueller et al. 2018). Warming and other climate change drivers are expected to induce changes in the quality of plant litter and other organic matter inputs accumulating in salt-marsh soils, for instance through shifts in the plant community composition that can potentially counterbalance or amplify the effects on decomposition processes suggested here (Mueller et al. 2018; 2020). Future research within the MERIT project will therefore address litter-quality-feedback effects on decomposition processes in order to gain a more complete understanding of warming effects on salt-marsh soil carbon cycling.*

Whether the solid PVC posts and perforated holes in which tea bags were placed had any impact that could lead to different conditions in terms of soil moisture, temperature and microbial activity compared to natural soils around need to be discussed.

We will, likewise, elaborate on this point in the Methodological considerations section.

*The use of PVC posts may have affected drainage and thus redox conditions of the deployed litter materials after flooding events. This could have amplified the redox differences between frequently and rarely flooded vegetation zones we observed. We argue that this potential effect on drainage is unimportant for the interpretation of our results, because our study was designed to gain mechanistic insight, not to capture actual rates of litter breakdown (compare comment above).*

Besides mean elevation other edaphic characteristics of the three marsh types could be described under site description to signify the zonations.

Additional information on the variability in edaphic characteristics along the elevation gradient from pioneer zone to high marsh will be added to the site description. This will include soil salinity, pH, organic carbon content, inorganic carbon content, and  $\delta^{13}C$  of the accumulated organic matter as a proxy of organic matter origin.

## Referee #2

The manuscript presents a study of belowground decomposition processes in salt marshes in response to climate warming, which are underexplored. The experiment has a novel experimental design that makes use of two warming treatments along a flooding gradient, where decomposition rates and stabilization factor were assessed throughout the soil profile using a standardized litter bag method (tea bag index; TBI). In addition, soil redox index was measured along this gradient to deduce whether changes in hydrology and redox conditions affect decomposition.

The study design has multiple aspects and gives interesting new insights to decomposition processes in this system and the manuscript is in general well written, though there are some sections that need further clarification. I also have more substantial comments regarding the methodology and performed analyses that I will detail below.

Since the experiment was performed in salt marshes, leaching could play a large role in mass loss due to high soil moisture/inundation and might influence the findings, see for example (Gessner et al. 2010, Lind et al. 2022, Marley et al. 2019). While the authors do state that they used a tidal wetland-adapted TBI protocol, I would like to see details on what adjustments this protocol has for the  $k$  and  $S$  calculations within the manuscript and whether this takes into account leaching. In addition, it might be good to raise and discuss this point already in the introduction.

We will provide more detail on the tidal wetland-adapted protocol (*sensu* Mueller et al. 2018, biogeosciences) in the Methods. Mueller and colleagues protocol assumes a higher hydrolyzable fraction than that of Keuskamp and colleagues (2013). It does not explicitly consider leaching. It is important to note that  $k$  did not increase, and  $S$  did not decrease with flooding (elevation gradient) or soil moisture (depth gradient) suggesting that leaching did not (overly) control our results.

We are aware of the above-mentioned studies highlighting the potential relevance of leaching and will cite them in the revised version. Because leaching is a rapid process, particularly in wetlands, we assume that leaching was complete throughout all vegetation zones and thus, did not contribute to the observed variability in  $k$  and  $S$ . We will elaborate on this point in the Discussion section (i.e. Methodological considerations).

I also wondered whether the use of PVC tubes could influence the conditions in which the decomposition experiment was performed, as the solid pipes might prevent water flow and could potentially also hinder the warming treatment used. Could the authors address this point. Potentially assess whether the temperature treatment was affected by the use of solid PVC tubes?

We will elaborate on this point in the respective subsection of the Discussion (i.e. Methodological considerations).

*The use of PVC posts may have affected drainage and thus redox conditions of the deployed litter materials after flooding events. This could have amplified the redox differences between frequently and rarely flooded vegetation zones we observed. We argue that this potential effect on drainage is unimportant for the interpretation of our results, because our study was primarily designed to gain mechanistic insight, not to capture actual rates of litter breakdown.*

*Concerning the temperature effect: The temperature of the PVC posts will equilibrate to the surrounding soil mass of the 7-m<sup>2</sup> plot (= 7 m<sup>3</sup> of heated soil), which far exceeds the thermal mass of the posts. PVC is a poor thermal conductor and would not be able to conduct heat vertically in soils.*

This also leads me to another point that I would like clarification on being the temperature monitoring. The authors only provide a mean temperature during the deployment time for the different zones. Which leaves me to wonder whether temperature was also monitored in the various treatments, to check whether treatments were effective. I could also not find at which depth temperature was monitored, only 1 depth or throughout soil profile? Could the authors provide a figure with the temperatures for the different zones and treatments throughout the deployment times to give a better representation of the treatments used?

Belowground temperatures were monitored continuously and logged at 5-min intervals. To control the heating rate evenly throughout the soil profile, sensors were placed at 5, 25, and 75 cm depth. At 5 cm, the highest variation in mean delta temperature across all marsh zones and plots ranged from 1.43° to 1.67° C for the +1.5° treatment, and 2.54° to 2.99° C for the +3.0° treatment. At 25 cm depth, we observed delta values ranging from 1.51° to 1.55° C for the +1.5° treatment and 2.87° to 3.02° for the +3.0° treatment. At 75 cm, delta values ranged from 1.14° to 1.43° C for the +1.5° treatment and 1.92° to 2.36° C for the +3.0° treatment (Rich et al. under review, Ecosystems).

A methods paper providing these and more details is currently under review. Therefore, we will not add result figures on the effectiveness of warming treatments to the present ms. Instead, we will add a brief summary on this to the Methods section and refer the reader to methods paper (Rich et al. under review). We will also provide a figure showing mean temperatures and mean delta temperatures measured during the 2019 season. This figure can be shared confidently with the reviewers but not beyond.

The description of the statistical analyses is different from the results you present. From the results I deduce that you have performed separate analyses of warming and zone and their interaction for the different years (between subject), excluding the effect of depth.

Then there is separate analysis of the effect of depth, depth\*zone and depth\*zone\*warming (within subject). In the statistical analyses section these are lumped together and it is not clear that the analyses were performed for each year separately. Furthermore, it is not clear to me why these analyses are split and what the authors mean with the indication “between subject” and “within-subject”? The “within subject” analysis would still need warming and zone included as separate factors to account for their effect.

We used the two-way repeated-measures ANOVA to test the effects of warming, zone, and depth (depth =within subject / repeated measure) for each year separately.

We were not primarily interested in year-to-year differences and therefore used ANOVAs separately for each year to better understand the interactions between warming, zone, and soil depth.

We will improve clarity of the statistical methods section in the revised ms.

Furthermore, there is no mention of analysis done to produce figure 5 and it is hardly discussed in the results. Lacking this information it is hard to properly assess the results.

The temperature-induced change in  $k$  and  $S$  ( $\Delta k$ ) was calculated relative to the ambient controls ( $k_0$ ) for each marsh zone separately:  $\Delta k (\%) = (k_t/k_0 - 1) \times 100$  and  $\Delta S (\%) = (S_t/S_0 - 1) \times 100$ ,  $t$  represents the value under different warming treatments (i.e. +1.5 and +3.0 ° C). Linear regression was used to analyze the relationships of  $\Delta k$  and  $\Delta S$  with soil depth. This information will be added to the Methods as well as to the caption of figure 5 in the revised ms.

Personally, I think Figure 5 gives a much better look into how the different factors influence decomposition rate  $k$  and  $S$ . I think expanding on this analysis would improve the manuscript as it sheds more light what factors/conditions affect decomposition in salt marshes. This could also be a way Figure 3 and 4 could then potentially be moved to supplementary material.

We agree with the reviewer that there is some redundancy between the figures and that Figure 5 yields more information than Figures 3-4. We are happy with the idea of moving Figures 3-4 to the Supplement, in case the editor agrees on this.

I also wondered why the authors did not use the measured soil reduction index in their analysis, as they as they discuss the influence of redox a lot in the discussion, but have not directly tested these links in their analysis. Why not use reduction index as predictor of  $k$  and  $S$ ?

We did not quantify soil reduction inside the experimental plots but along a transect directly adjacent to the plots. Thus, there are no data on warming effects on soil reduction. Soil reduction was assessed to characterize the three marsh zones across which the experimental plots are distributed, i.e., pioneer zone, low marsh, high marsh. We originally intended to present this information in the Methods section just like we provided other aspects of the site and zone characterization here (e.g. plant-community composition, surface elevation) but were asked by the editor to move it to the results section prior to peer review. In any case, we believe these are important data to show that soil redox conditions actually differ between marsh zones and with respect to soil depth. However, we cannot use these data for e.g. correlations with  $S$  or  $k$ .

#### Specific comments

line 68. What do the authors mean with short- and mid-term warming?

Short- and mid-term was intended to refer to year 1 and 2 of the experiment, respectively. However we are not using this concept in the later parts of the ms and will therefore remove this and related statements.

Line 96 Can the authors also indicate the location of the different warming treatments. And were these treatments randomly assigned?

Treatments were randomly assigned. Locations will be added to the figure.

Line 132. Not clear if it is 1 PVC stick per zone or whether there is replication? The transect in the next line adds to my confusion. Figure 6 legend states “n = 6 observations per zone, deployed over four consecutive deployment campaigns (July-October)”. Clarify in methods.

There were 6 sticks per zone (n = 6); in total 3 x 6 = 18 sticks per campaign. There were 4 campaigns. So in total 4 x 18 = 72 sticks were analyzed. We will improve the description for the revised version.

Figure 3 Hard to read this figure as the error bars of the different treatments are overlapping. Please adjust figure so it is possible to discern the different treatments per soil depth.

Figure layout will be adjusted or moved to Supplement.

Line 114 Incubation period different in 2018 and 2019, June-Sept vs May-July. Why? This does explain why temperatures were higher in 2018 as it is later in the season.

We agree with the reviewer and will add this aspect to the Discussion section. The two incubation experiments were started after the warming treatment was switched on in each year: In year 1, warming was switched on in May, in year 2, warming started in April. We were not primarily interested in year-to-year differences, but repeated the incubation in order to test if results from year 1 are replicable. We will make this clearer in the revised version.

Line 150-153 It is not clear to me what the authors are trying to say. Clarify

Will be rephrased.

Figure 3c Why high marsh higher k in +1.5 vs +3.0 treatment?

This is indeed an interesting pattern. If higher k at 1.5 vs 3.0 was only observed at the soil surface, drought effects could have played a role in the less-frequently flooded high marsh. However, the pattern is relatively consistent throughout the soil profile. We will elaborate on this point in the revised Discussion section, focusing on plant-microbe interactions and nutrient constraints as

potential drivers of the effect (compare Noyce et al. 2019). It is also important to stress that the pattern disappears in year 2.

Why k higher in warming treatments in 2019 vs 2018? Bigger difference in temperature?

Temperature differences were consistent between years: The mean delta temperature across all marsh zones and plots ranged from 0.99° to 1.66° C for the +1.5°C treatment, and 1.61° to 2.81° C for the +3.0°C treatment in 2018, and the mean delta temperature across all marsh zones and plots ranged in 2019 from 1.26° to 1.82° C for the +1.5°C treatment, and 1.69° to 2.81° C for the +3.0°C treatment (Table 1). One potential reason is greater microbial biomass in year 2 vs. 1 of the experiment as warming stimulated plant growth and substrate input to the soil system. However, also differences in the actual temperature (not delta T) and the slight seasonal shift between the two incubation periods could have affected the magnitude of warming effects. We will discuss this point in the revised Discussion.

Table 1 Average belowground temperature across marsh zones and warming treatments in 2018 and 2019. Value are means ± SE (n =3).

| Year | Treatment | Pioneer zone | Low marsh    | High marsh   |
|------|-----------|--------------|--------------|--------------|
| 2018 | Ambient   | 16.45 ± 0.12 | 15.99 ± 0.14 | 14.54 ± 0.44 |
|      | + 1.5°C   | 17.66 ± 0.11 | 16.98 ± 0.29 | 16.20 ± 0.22 |
|      | + 3°C     | 18.06 ± 0.67 | 18.07 ± 0.37 | 17.35 ± 0.09 |
| 2019 | Ambient   | 13.55 ± 0.33 | 12.95 ± 0.10 | 12.46 ± 0.03 |
|      | + 1.5°C   | 15.37 ± 0.14 | 14.21 ± 0.22 | 13.89 ± 0.04 |
|      | + 3°C     | 16.36 ± 0.11 | 15.01 ± 0.14 | 14.15 ± 0.42 |

Technical corrections:

Line 49 “in” question

Will be changed accordingly.

Line 50. Do the authors mean labor intensive instead of efficient? Constructing a lot of litter bags is labor intensive in my opinion.

Will be improved accordingly.

Line 54 rephrase: represents a widely used standardized litter bag approach

Will be changed accordingly.

Line 68 replace “over” with “for”. Over implies the incubation time was either 1 or 2 years, but there were separate 3-month incubations in each year.

Will be changed accordingly.

Line 81 Can the authors use a more widely known standard like meter above sea level for to indicate elevation instead of NHN?

Will be changed accordingly.

Line 132 “.” After citation

Will be changed accordingly.

Line 132 remove “from pioneer.... High marsh.”

Will be changed accordingly.

Line 248 known

Will be changed accordingly.

### **Referee #3**

This paper examines patterns of initial decomposition rate and stabilization factor over a flooding gradient and depth profile in a tidal marsh. The focus on decomposition over an elevation gradient and belowground, where the greatest contribution by plants to blue C accumulation occurs, represents an important contribution to the literature. Further, the use of standard substrate to control for litter quality allows for a focus on abiotic drivers of decay. Overall, this is a good paper that, with some clarifications to the methods and stats and additional interpretation of results, will add valuable insights to decomposition processes in tidal marshes that are especially vulnerable to climate change.

Specific comments and questions:

L60-61: clarify by explaining what their proposed mechanism is for how the lack of oxygen inhibits warming effects.

We will provide more background here, focusing on the enzymic latch hypothesis and the recalcitrance of chemically stable tissues, such as phenolic compounds, in the absence of oxygen.

L63: reiterate that the use of a standard substrate is needed to understand warming effects.

Will be changed accordingly.

L70: is the first hypothesis expected regardless of soil depth?

Yes, the first hypothesis is meant to be general, and the second hypothesis is meant to further specify and explore the interaction effects with marsh zone and soil depth.

Site description – Figure 1 is difficult to see, and the zones are not clearly defined in the text. It would be helpful to explain how the zones are oriented relative to the open water, with the pioneer zone along the shoreline and the high marsh farthest inland. Also, how is “pioneer zone” defined?

The figure 1 will be improved accordingly, and more detail will be added to the site description.

*The pioneer zone is a typical feature of NW European salt marshes (and elsewhere) and is typically distinguished from the low marsh in studies from this region. The pioneer zone is defined as the area where pioneer vegetation covers  $\geq 5\%$  (Petersen et al., 2014). In the Wadden Sea region its average surface elevation is below mean high tide. Thus, the pioneer zone is typically flooded twice daily (Esselink et al. 2017). This information will be added to the revised ms.*

Experimental design – How was the soil warming established and verified along the soil depth gradient? Was there uniform warming of the soil column or did it vary with depth? It would be nice to see a graph of these data. Did you confirm treatment conditions of +1.5 and +3 degrees warming? Why was the average soil temperature from -10 and -60 cm used as opposed to looking at temperature along the soil depth gradient at the same intervals at which decomposition and soil reduction were measured?

Belowground temperatures were monitored continuously and logged at 5-min intervals. To control the heating rate evenly throughout the soil profile, sensors were placed at 5, 25, and 75 cm depth. At 5 cm, the highest variation in mean delta temperature across all marsh zones and plots ranged from 1.43° to 1.67° C for the +1.5° treatment, and 2.54° to 2.99° C for the +3.0° treatment. At 25 cm depth, we observed delta values ranging from 1.51° to 1.55° C for the +1.5° treatment and 2.87° to 3.02° for the +3.0° treatment. At 75 cm, delta values ranged from 1.14° to 1.43° C for the +1.5° treatment and 1.92° to 2.36° C for the +3.0° treatment (Rich et al. under review, Ecosystems).

More detail is provided to a similar comment by Reviewer #1.

Decomposition – why was this examined across two different periods (June-Sept vs. May-July) in the two years? It is not surprising that ambient temperatures were cooler in year 2 (late spring/early summer) than in year 1 (late summer), which may have contributed to the larger effect sizes of



warming in year 2 compared to year 1. Address why these time periods were selected, and later discuss how this could have affected results.

We agree with the reviewer and will add this aspect to the Discussion section. The two incubation experiments were started after the warming treatment was switched on in each year: In year 1, warming was switched on in May, in year 2, warming started in April. We were not primarily interested in year-to-year differences, but repeated the incubation in order to test if results from year 1 are replicable. We will make this clearer in the revised version.

Statistics – This section is lacking details and does not fully track with the results presented. Were years compared statistically or tested separately? Why or why not? How were the effect sizes determined and analyzed, and why was this only examined in year 2? How was soil reduction analyzed?

We used the two-way repeated-measures ANOVA to test the effects of warming, zone, and depth (depth =within subject / repeated measure) for each year separately.

We were not primarily interested in year-to-year differences and therefore used ANOVAs separately for each year to better understand the interactions between warming, zone, and soil depth.

Based on the results of two-way repeated-measure ANOVA, the significant warming x depth x zone interaction was detected in year 2 only. A more detailed presentation of effect sizes was therefore restricted to year 2.

We will improve clarity of the statistical methods section in the revised ms.

Soil reduction: this parameter was assessed using the Indicator of Reduction in Soils technique. We agree that the information given on the methods is insufficient. We will provide a thorough description in the revised Methods section.

For the discussion and methodological considerations, how much could leaching be contributing to the results and different findings for k and S along the flooding gradient? How did the PVC influence the hydrology or connectivity of the tea bags with their surroundings? Was the temperature gradient verified within those PVC pipes? It would also be useful to revisit the importance of litter quality, as well as species-specific differences in decay with species turnover along the elevation gradient. While this study was designed to avoid plant influences, brief discussion of how it could affect these patterns, and how shifts in community composition with sea-level rise is another climate change driver to be considered that, if species differ in their contributions to blue C, could have implications for marsh resilience.

Similar comments with respect to leaching, PVC-post effects on the abiotic environment, and litter quality were made by R1 and R2 (compare above). The section on Methodological considerations will be improved in accordance.

Technical comments:

L13: clarify “plant production”

Will be changed accordingly.

L15: suggest “entire intertidal flooding gradient”

Will be changed accordingly.

L17: delete “of” before “(k)”

Will be changed accordingly.

L54: delete “probably”

Will be changed accordingly.

L59: offset “and thus strongly reducing” with commas

Will be changed accordingly.

L69: what is short- and mid-term warming effects? Is this in reference to projected warming of +1.5 vs. 3 degrees?

Will be changed accordingly.

L71: combine sentences so that it reads “...soil, and (2) that warming...”

Will be changed accordingly.

L77: “has operated” instead of “operates”

Will be changed accordingly.

L79: change comma after climate to semicolon

Will be changed accordingly.

L148: should this be “appear to be consistent”?

Will be changed accordingly.

L150: this is unclear. What do you mean by “refer the significant interaction”?

Will be changed accordingly.

L152: clarify that the relationship is “with increasing soil depth”

Will be changed accordingly.

L192: change to “a large” instead of “an”

Will be changed accordingly.

L209: add a comma after the citation

Will be changed accordingly.

L248: “known”

Will be changed accordingly.
